# Supplementary material for: Tailoring SWIR emission in tri-lanthanide-doped CaF2 nanoparticles
Source: Royal Society of Chemistry journal article supplement (doi:10.1039/c5ra26233j), 2016-01-01
Supplement: c5ra26233j1.pdf [file c5ra26233j1.pdf]

## Supporting Information

### **Tailoring SWIR Emission in Tri-Lanthanide-Doped CaF<sub>2</sub> Nanoparticles**

Xinyu Zhao and Mei Chee Tan\*

Engineering Product Development, Singapore University of Technology and Design,  
Singapore, 8 Somapah Road, Singapore 487372

\*To whom correspondence should be addressed. Email: [meichee.tan@sutd.edu.sg](mailto:meichee.tan@sutd.edu.sg)

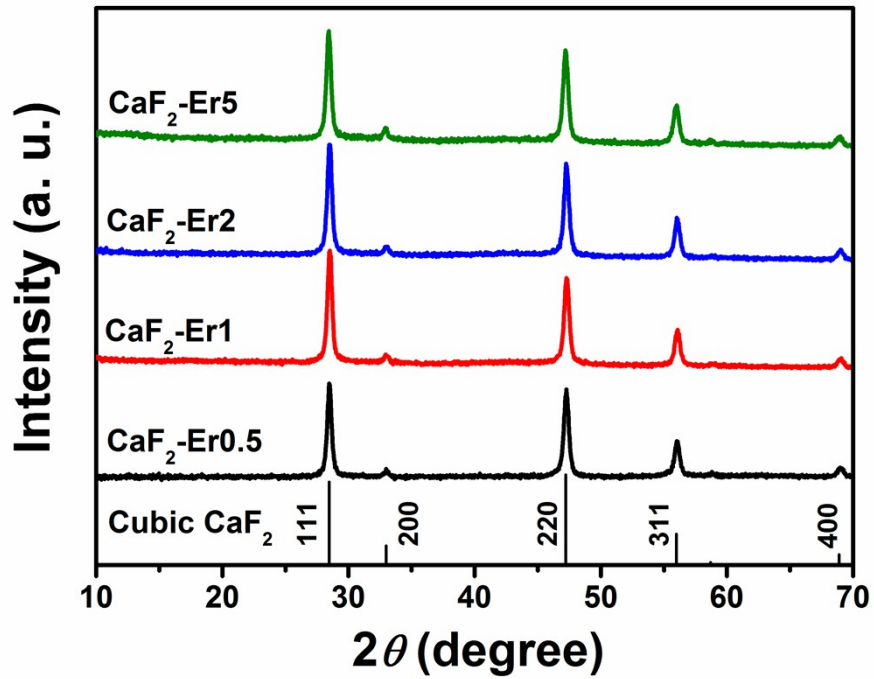

Figure S1. XRD patterns of CaF<sub>2</sub> nanoparticles with Yb dopant concentration 20 mol% synthesized using different Er concentrations ranging from 0.5 to 5 mol%. Reference powder diffraction files of cubic CaF<sub>2</sub> from JCPDS 35-0816 was used.

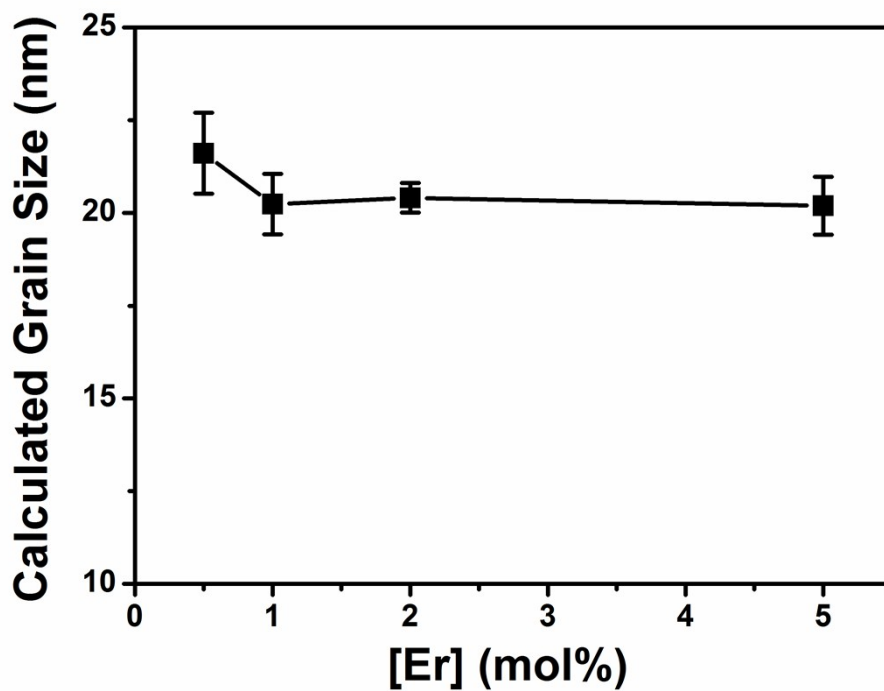

Figure S2. Estimated grain sizes using the Scherrer equation from XRD patterns of  $\text{CaF}_2\text{:Yb,Er}$  nanoparticles with Er doping concentration ranging from 0.5 to 5 mol%

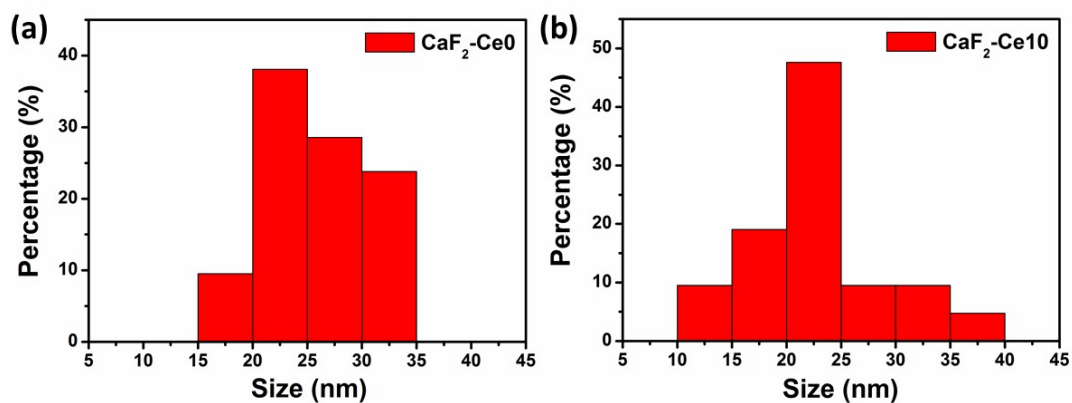

Figure S3. Size distributions of  $\text{CaF}_2\text{-Ce0}$  (a) and  $\text{CaF}_2\text{-Ce10}$  (b) samples measured by calculating 30 particles from TEM images. The average size of  $\text{CaF}_2\text{-Ce0}$  and  $\text{CaF}_2\text{-Ce10}$  samples are  $\sim 25.7 \pm 5.1$  and  $\sim 23.0 \pm 5.5$  nm.

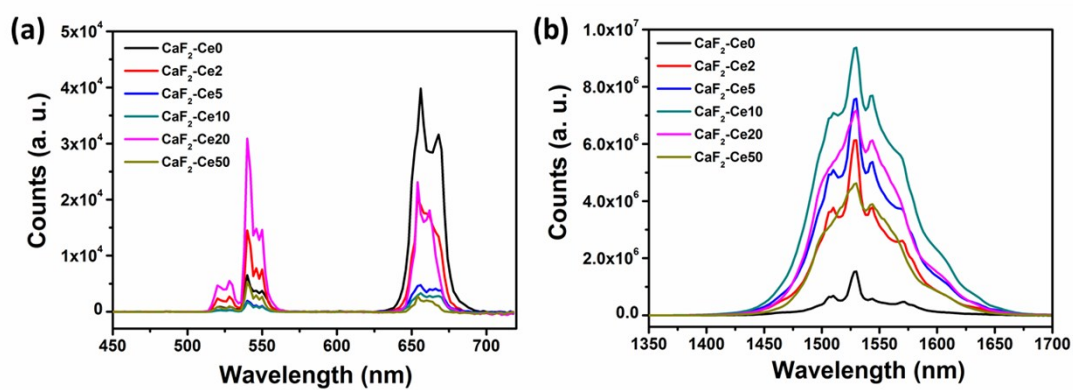

Figure S4. Up-converting visible (a) and down-shifting infrared emissions (b) of  $\text{CaF}_2:\text{Yb},\text{Er}$  nanoparticles with Ce doping concentration ranging from 0 to 50 mol%.

Table S1. Atomic ratio of Ca, F and Ce element of  $\text{CaF}_2$  nanoparticles calculated from EDX spectrum.

| Sample                                                 | Ca   | F    | Ce   |
|--------------------------------------------------------|------|------|------|
| $\text{CaF}_2:\text{Yb}_{20}\text{Er}_2\text{Ce}_0$    | 1.00 | 2.94 | 0    |
| $\text{CaF}_2:\text{Yb}_{20}\text{Er}_2\text{Ce}_{10}$ | 1.00 | 3.81 | 0.16 |

Table S2. Fitted decay constants of time resolved emission spectra at 1530 nm for CaF<sub>2</sub> nanoparticles using a double exponential equation.

| Sample                                                              | A <sub>1</sub><br>(%) | τ <sub>1</sub> (μs) | Standard<br>error | A <sub>2</sub><br>(%) | τ <sub>2</sub> (μs) | Standard<br>error |
|---------------------------------------------------------------------|-----------------------|---------------------|-------------------|-----------------------|---------------------|-------------------|
| CaF <sub>2</sub> :Yb <sub>20</sub> Er <sub>2</sub> Ce <sub>0</sub>  | 74.8                  | 292.2               | 1.94              | 25.2                  | 2300.3              | 11.35             |
| CaF <sub>2</sub> :Yb <sub>20</sub> Er <sub>2</sub> Ce <sub>2</sub>  | 55.2                  | 574.4               | 4.10              | 44.8                  | 3014.9              | 10.67             |
| CaF <sub>2</sub> :Yb <sub>20</sub> Er <sub>2</sub> Ce <sub>5</sub>  | 50.9                  | 784.0               | 5.78              | 49.1                  | 3826.5              | 14.60             |
| CaF <sub>2</sub> :Yb <sub>20</sub> Er <sub>2</sub> Ce <sub>10</sub> | 51.2                  | 3883.0              | 14.66             | 48.8                  | 810.2               | 6.41              |
| CaF <sub>2</sub> :Yb <sub>20</sub> Er <sub>2</sub> Ce <sub>20</sub> | 47.6                  | 479.8               | 4.05              | 52.4                  | 1916.2              | 5.90              |
| CaF <sub>2</sub> :Yb <sub>20</sub> Er <sub>2</sub> Ce <sub>50</sub> | 48.2                  | 1461.9              | 5.36              | 51.8                  | 400.9               | 3.40              |
| CaF <sub>2</sub> :Er <sub>2</sub> Ce <sub>10</sub> Yb <sub>10</sub> | 45                    | 3953.0              | 15.50             | 55                    | 771.8               | 5.17              |
| CaF <sub>2</sub> :Er <sub>2</sub> Ce <sub>10</sub> Yb <sub>20</sub> | 51.2                  | 3883.0              | 14.66             | 48.8                  | 810.2               | 6.41              |
| CaF <sub>2</sub> :Er <sub>2</sub> Ce <sub>10</sub> Yb <sub>30</sub> | 42.6                  | 616.6               | 5.39              | 57.4                  | 2606.0              | 7.60              |
